# Supplementary material for: Progesterone Attenuates SIRT1-Deficiency-Mediated Pre-Eclampsia
Source: MDPI journal article supplement (doi:10.3390/biom12030422), 2022-03-09
Supplement: s1 [file s1]

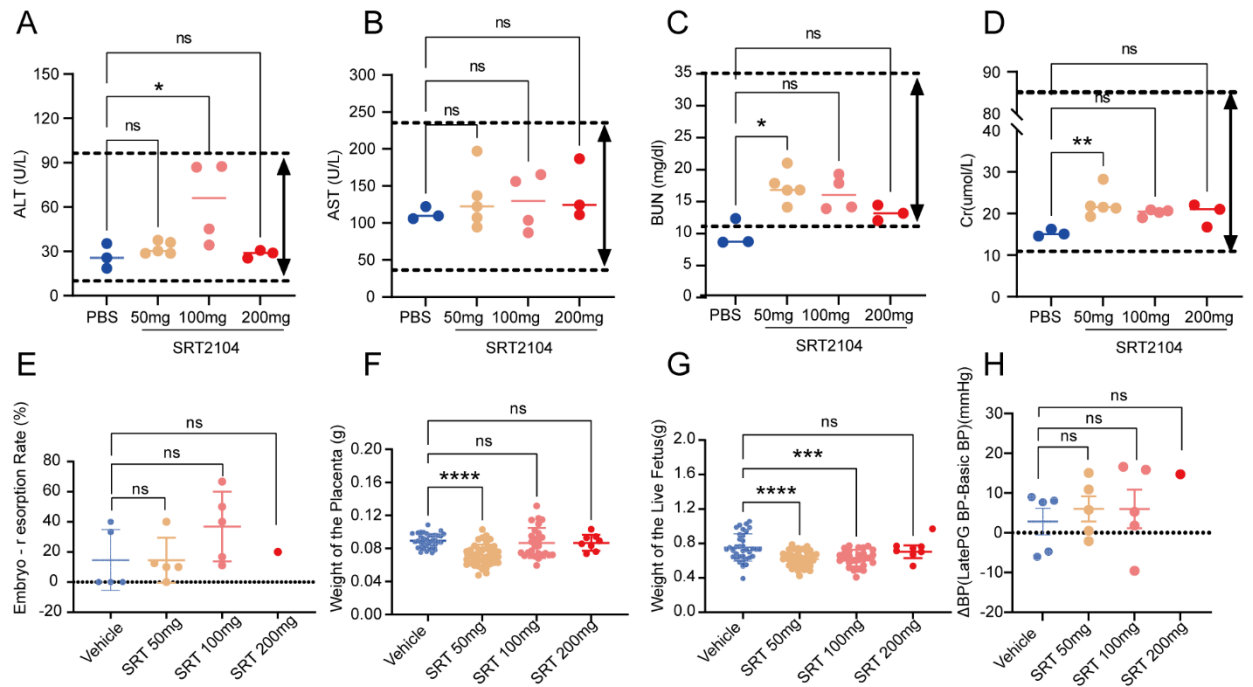

**Figure S1.** SRT2104 for intragastric administration. (A–D) The level of ALT (A), AST (B), BUN (C), and CR (D) of serum in mice with PBS ( $n = 3$ ), SRT 50mg ( $n = 5$ ), SRT 100mg ( $n = 4$ ), and SRT 200 mg ( $n = 3$ ), respectively. (E–H) The embryo-resorption rate (E), the weight of the placenta (F), the weight of the live fetus (G), and  $\Delta$ BP (late PG—basic condition) (H) in mice with PBS ( $n = 5$ ), SRT 50 mg ( $n = 5$ ), SRT 100 mg ( $n = 5$ ), and SRT 200 mg ( $n = 1$ ), respectively. Error bars, mean  $\pm$  SD. The data were analyzed by one-way ANOVA (and nonparametric or mixed) and unpaired Student's test (and nonparametric tests). \*  $P < 0.05$ ; \*\*  $P < 0.01$ ; \*\*\*  $P < 0.001$ ; \*\*\*\*  $P < 0.0001$ .
